# Supplementary material for: Morpho-Anatomy of Planktonic Algae in Relation With Water Quality Pattren of Dor River Hazara Pakistan
Source: Research Square preprint supplement (doi:10.21203/rs.3.rs-7516980/v1), 2025-09-17
Supplement: Supplementary file 1 [file 4f74f6ea21b9c54be1e858d4.docx]

**Principal component analysis (PCA) of fresh water algae 2021-22**

|  | **PC 1** | **PC 2** | **PC 3** | **PC 4** | **PC 5** | **PC 6** | **PC 7** | **PC 8** | **PC 9** | **PC 10** | **PC 11** | **PC 12** |
| --- | --- | --- | --- | --- | --- | --- | --- | --- | --- | --- | --- | --- |
| *Anabaena fertilissima* | 3.9862 | 1.0506 | 0.57546 | 1.4957 | 0.009315 | 0.73716 | 0.46033 | 0.082395 | 0.1106 | 0.068358 | -0.11284 | -0.00088 |
| *Anomoeoneis vitrea* | -0.0484 | 0.26424 | 0.57387 | -1.0471 | 0.82761 | -0.6591 | 0.89172 | -0.20723 | 0.021361 | 0.14172 | 0.012464 | -0.01411 |
| *Ceratium hirudinella* | 0.22916 | -0.44551 | -0.24433 | -0.11797 | -1.2327 | -0.2121 | 0.14489 | -0.10781 | -0.001 | 0.033078 | -0.05989 | 0.016528 |
| *Chroococcus turgidus* | -0.4906 | -0.03575 | 0.42607 | -0.85727 | -0.54626 | 0.6824 | -0.1356 | -0.1161 | 0.018368 | -0.31325 | -0.31307 | 0.012408 |
| *Diploneis puella* | -0.9760 | -0.26457 | -1.3154 | 0.064606 | 0.73824 | 0.47329 | -0.4175 | 0.3912 | 0.16537 | 0.22534 | -0.17081 | -0.19516 |
| *Fragilaria famelica* | 0.2332 | -3.0196 | 2.077 | 0.49304 | 0.70756 | 0.26285 | -0.3452 | 0.17658 | -0.07117 | -0.07216 | 0.073134 | -0.03265 |
| *Merismopedia punctata* | -0.9194 | -0.15167 | 0.35941 | -0.12488 | -0.65198 | 0.32322 | 0.16569 | -0.1386 | -0.27607 | 0.74351 | -0.11985 | 0.045798 |
| *Hydrococcaceae minor* | 0.98119 | -0.43768 | -0.20308 | -0.73935 | -0.02479 | -0.0132 | -0.1408 | -0.23265 | 0.14188 | -0.29772 | -0.03231 | 0.08449 |
| *Pectinodesmus regularis* | -0.9226 | 0.2502 | -0.7162 | -0.49258 | 0.26116 | 0.68563 | 1.251 | 0.93652 | -0.15764 | -0.24222 | 0.083767 | 0.019763 |
| *Pinnularia microstauron* | -0.3855 | -0.51239 | -0.74201 | 0.68207 | -0.75315 | -0.7493 | 0.31471 | -0.18533 | 0.46812 | -0.17151 | -0.04792 | -0.14246 |
| *Scenedesmus armatus* | -0.0858 | -0.12068 | -0.34722 | -0.06998 | 0.13177 | -0.4063 | -0.5361 | -0.07492 | -0.17586 | -0.08325 | -0.19702 | 0.030882 |
| *Rhopalodia gibba* | -1.9237 | 2.4133 | 1.2484 | 1.026 | 0.56385 | -0.0848 | -0.4022 | -0.19045 | -0.26154 | -0.18403 | -0.04159 | -0.04096 |
| *Sellaphora pupula* | 1.0247 | 0.59183 | 0.043938 | -1.0752 | 0.60151 | -0.6066 | -0.2509 | -0.23964 | -0.00871 | -0.05971 | -0.07405 | 0.04591 |
| *Strombomonas costata* | -0.4181 | 0.44615 | -0.05837 | -0.00267 | 0.063942 | 0.59291 | 0.10336 | -0.89988 | 0.29471 | 0.042098 | 0.33111 | -0.05236 |
| *Staurosira construens* | -0.5848 | 0.85455 | 0.86779 | -0.26076 | -0.1938 | -0.2417 | -0.6623 | 0.86794 | 0.68155 | 0.19182 | 0.11733 | 0.11414 |
| *Trachelomonas hispida* | 0.46432 | 0.21322 | -0.40097 | 0.5367 | -0.89045 | -0.4857 | -0.5565 | 0.50055 | -0.48621 | -0.14243 | 0.22359 | -0.03844 |
| *Basicladia crassa* | 0.03162 | -0.49799 | -2.3511 | 0.65204 | 0.68603 | 0.5133 | -0.5116 | -0.2523 | -0.05466 | 0.033362 | 0.080831 | 0.14888 |
| *Lyngbya semiplena* | -1.591 | -0.72437 | 0.039379 | 1.456 | 0.080576 | -0.8224 | 0.76542 | -0.16482 | -0.01622 | -0.01677 | -0.03289 | 0.11008 |
| *Phormidium chlorinum* | 1.9533 | 0.089616 | -0.38257 | -0.78796 | 0.25904 | -0.8346 | -0.0570 | 0.11923 | -0.24523 | 0.16822 | 0.11563 | -0.08271 |
| *Ulothrix zonata* | -0.5570 | 0.03659 | 0.54997 | -0.83047 | -0.63751 | 0.84578 | -0.0809 | -0.26469 | -0.14765 | -0.06445 | 0.16438 | -0.02915 |

| **Monthly Environmental Water Quality Data Of Dor River** | | | | | | | | | | | | | | | |
| --- | --- | --- | --- | --- | --- | --- | --- | --- | --- | --- | --- | --- | --- | --- | --- |
| **Months** | **PH** | **Ca** | **Mg** | **Cl** | **K** | **HCO3** | **Na** | **SO4** | **NO3** | **EC** | **Alk** | **Turb** | **TDS** | **Temp.** | **Rainfall** |
| **Units** |  | ppm | ppm | ppm | ppm | ppm | Ppm | Ppm | ppm | μS/cm | ppm | NTU | ppm | °C | mm |
| **March** | 7.01 | 28.1 | 33.1 | 55.1 | 7.18 | 221.1 | 51.4 | 33.1 | 8.3 | 777 | 143.8 | 11.6 | 231.1 | 11.86 | 75.37 |
| **April** | 7.11 | 22.8 | 31.2 | 51.4 | 7.13 | 208.1 | 43.7 | 31.9 | 4.32 | 571 | 176.7 | 14.8 | 321.9 | 13.02 | 220.68 |
| **May** | 7.21 | 27.12 | 31.4 | 36.7 | 7.09 | 121.1 | 44.5 | 29.1 | 7.91 | 661 | 198.6 | 9.88 | 311.6 | 18.17 | 189.44 |
| **June** | 7.23 | 29.9 | 29.2 | 38.9 | 7.34 | 69.9 | 41.8 | 26.9 | 7.66 | 471 | 201.9 | 13.6 | 427.33 | 33.46 | 159.86 |
| **July** | 7.01 | 21.4 | 29.1 | 49.4 | 8.53 | 31.8 | 39.9 | 39.5 | 8 | 489 | 176.7 | 17.7 | 466.9 | 30.86 | 86.33 |
| **August** | 7.18 | 24.5 | 25.1 | 31.9 | 11.07 | 98.1 | 54.7 | 36.8 | 7.98 | 646 | 156.7 | 19.5 | 491.1 | 34.02 | 71.16 |
| **September** | 7.13 | 28.1 | 21.3 | 35.6 | 9.5 | 111 | 49.9 | 38.9 | 5.98 | 631 | 144.6 | 13.7 | 403.3 | 32.55 | 266.04 |
| **October** | 7.09 | 25.7 | 29.1 | 37.8 | 11.5 | 131 | 52.9 | 33.3 | 5.1 | 751 | 121.9 | 11.2 | 446.33 | 29.6 | 271.52 |
| **November** | 7.17 | 23.2 | 27.4 | 39.9 | 13.1 | 201 | 49.1 | 31.6 | 6.81 | 756 | 211.8 | 13.2 | 421.8 | 27.28 | 91.48 |
| **December** | 7.07 | 22.1 | 26.9 | 44.8 | 9.6 | 190.1 | 54.9 | 38.1 | 8.8 | 633 | 256.8 | 12.4 | 231.9 | 23.32 | 48.59 |
| **January** | 7.19 | 27.2 | 31.1 | 48.9 | 12.4 | 113.3 | 47.9 | 33.1 | 8.1 | 651 | 277.1 | 11.41 | 244.1 | 17.66 | 55.77 |
| **February** | 7.21 | 24.1 | 29.6 | 45.5 | 11.7 | 161.7 | 49.5 | 47 | 8.88 | 768 | 254.7 | 12.9 | 196.1 | 14.27 | 30.17 |
